# Supplementary material
Source: PubMed Central journal article supplement (PMC3019737)
Supplement: supp_77_1_179__1.pdf [file supp_77_1_179__1.pdf]

## Supplementary material

### Simultaneous presence of PrtH and PrtH2 proteinases in *Lactobacillus helveticus* strains improves breakdown of the pure $\alpha_{s1}$ -casein

Sadat-Mekmene L.<sup>1,2</sup>, Jardin J.<sup>1,2</sup>, Corre C.<sup>1,2</sup>, Mollé D.<sup>1,2</sup>, Richoux R.<sup>3</sup>, Delage M.-M.<sup>1,2</sup>, Lortal S.<sup>1,2</sup>, and Gagnaire V.<sup>1,2\*</sup>

<sup>1</sup>INRA, <sup>2</sup>AGROCAMPUS OUEST, UMR1253, Science et Technologie du Lait et de l'Œuf, F-35042 Rennes, France.

<sup>3</sup>Actilait, BP 50915, F-35000 Rennes, France.

\*Corresponding author: telephone (33)0223485346; fax (33)0223485350;

e-mail [valerie.gagnaire@rennes.inra.fr](mailto:valerie.gagnaire@rennes.inra.fr).

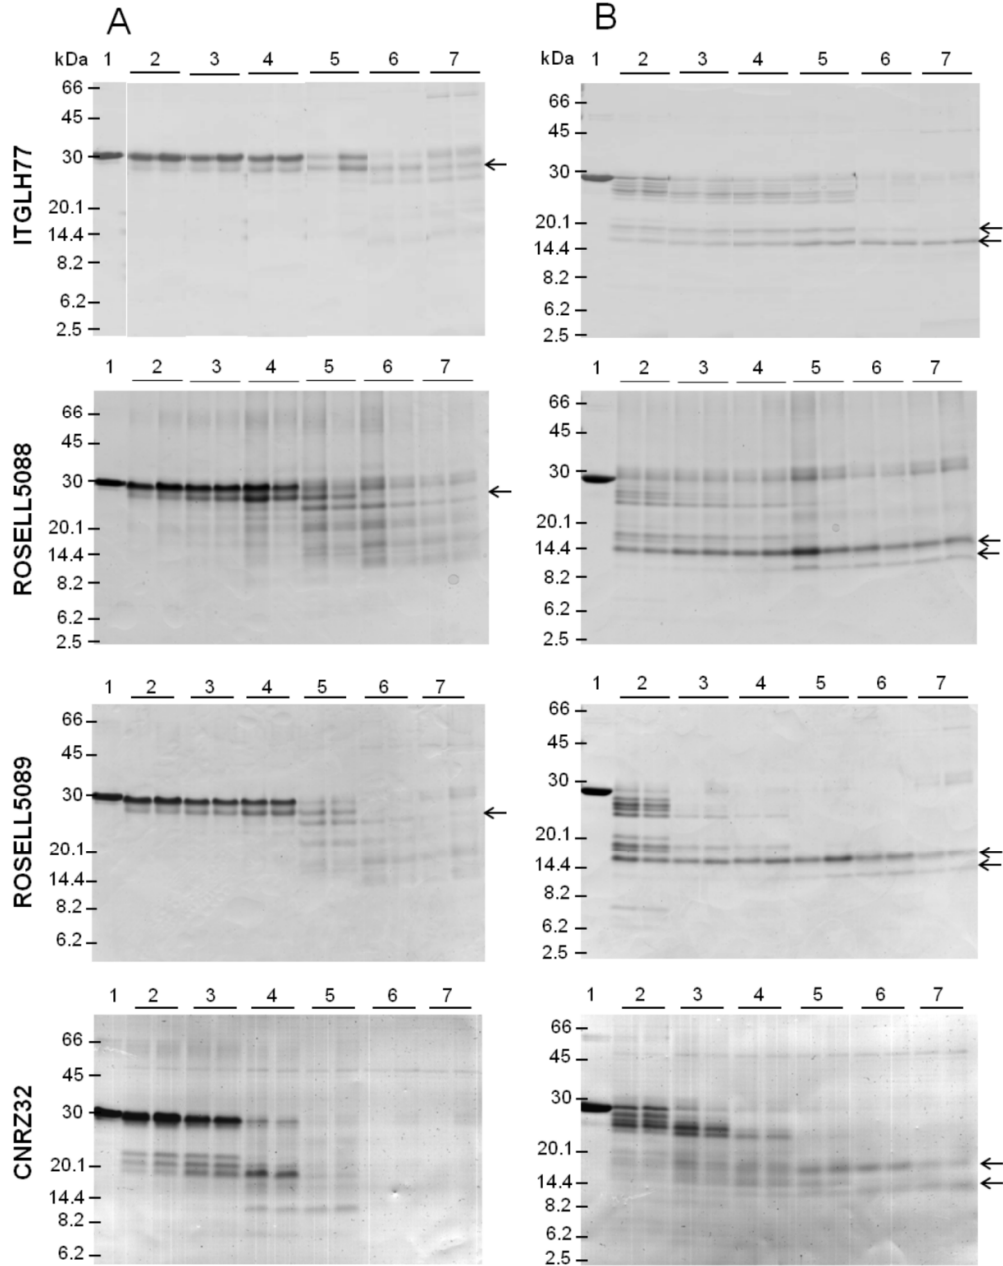

**FIG. S1.** Hydrolysis of purified  $\alpha_{s1}$ -casein (A) and  $\beta$ -casein (B) by strains of *L. helveticus* after growth in Low Low Heated milk. Caseins were incubated at 40°C with washed-cell suspensions of *L. helveticus* strains. Samples were taken after 0 min (lane 1), 5 min (lane 2), 15 min (lane 3), 30 min (lane 4), 60 min (lane 5), 120 min (lane 6) and 180 min (lane 7) of hydrolysis. Cells were removed by centrifugation, and the supernatants were analysed by SDS-PAGE. Experiments were performed in duplicate. Names of the strains are indicated on the left of the gels. The arrow indicated peptides which were present all the incubation time long.

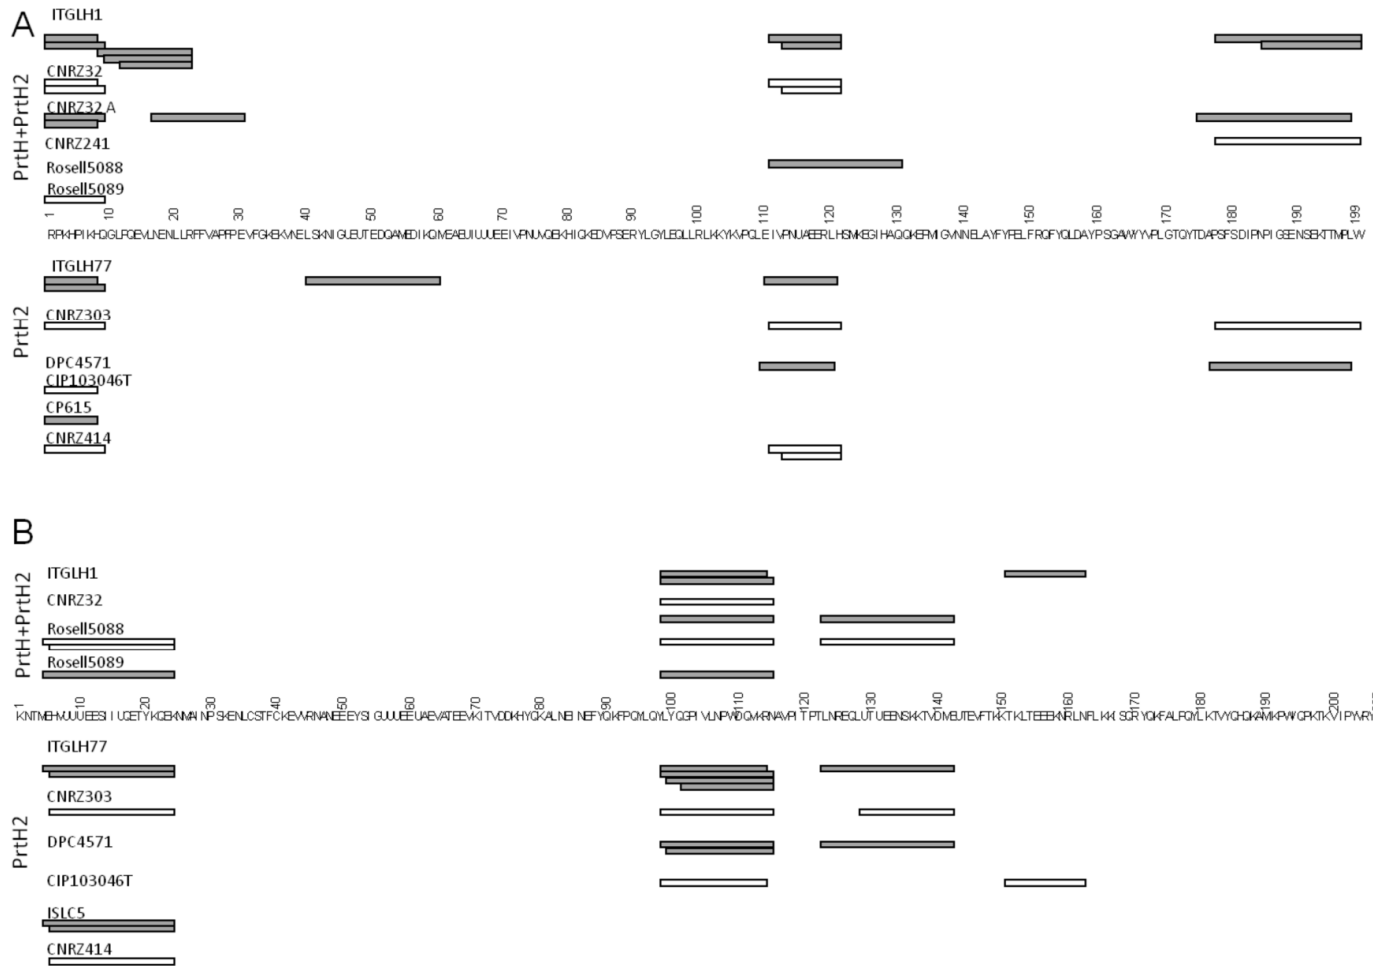

**FIG. S2.** Degradation profiles of (A)  $\alpha_{s1}$ -casein, (B)  $\alpha_{s2}$ -casein and (C)  $\beta$ -casein by *L. helveticus* strains grown in UHT milk. Rectangles correspond to peptides identified by mass spectrometry after centrifugation and filtration of acidified milk. U designates a phosphoserine residue.

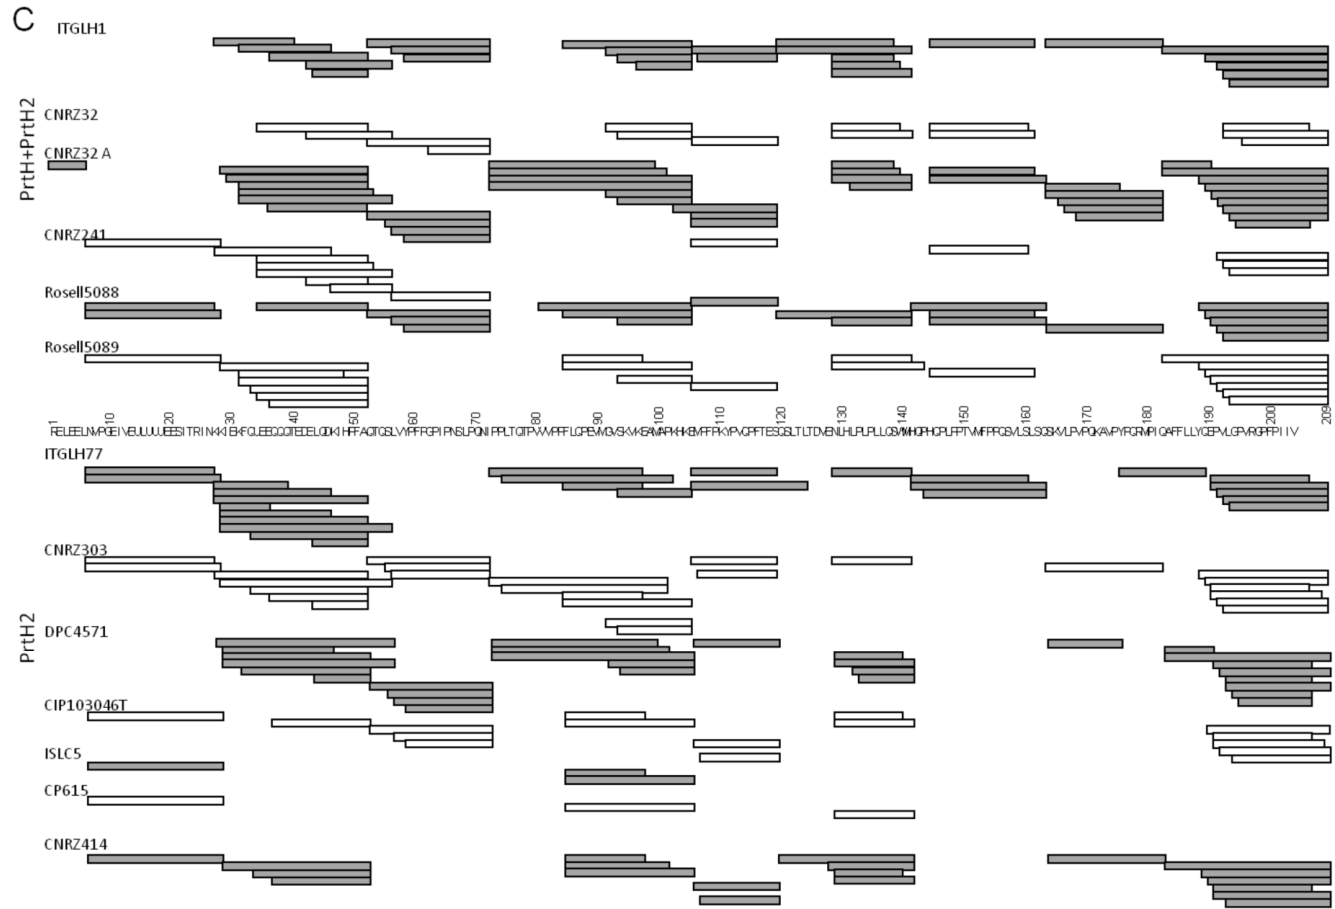

**FIG. S2** (continued)

**TABLE S1.** Peptides identified from  $\alpha_{s1}$ -casein hydrolysis by four strains of *L. helveticus*; peptides released from purified casein (P) or from milk (M). Strains having two CEPs (ITGLH1 and Rosell5088) and strains having only one CEP (ITGLH77 and ISLC5) are shown.

| $\alpha_{s1}$ -CN Peptides            | ITG LH1 |   | Rosell 5088 |   | ITG LH77 |   | ISLC5 |   |
|---------------------------------------|---------|---|-------------|---|----------|---|-------|---|
|                                       | P       | M | P           | M | P        | M | P     | M |
|                                       |         |   |             |   |          |   |       |   |
| $\alpha_{s1}$ -CN (1-7)               |         |   |             |   |          |   |       |   |
| $\alpha_{s1}$ -CN (1-8)               |         |   |             |   |          |   |       |   |
| $\alpha_{s1}$ -CN (1-9)               |         |   |             |   |          |   |       |   |
| $\alpha_{s1}$ -CN (8-14)              |         |   |             |   |          |   |       |   |
| $\alpha_{s1}$ -CN (8-15)              |         |   |             |   |          |   |       |   |
| $\alpha_{s1}$ -CN (8-16)              |         |   |             |   |          |   |       |   |
| $\alpha_{s1}$ -CN (8-19)              |         |   |             |   |          |   |       |   |
| $\alpha_{s1}$ -CN (8-21)              |         |   |             |   |          |   |       |   |
| $\alpha_{s1}$ -CN (9-14)              |         |   |             |   |          |   |       |   |
| $\alpha_{s1}$ -CN (9-15)              |         |   |             |   |          |   |       |   |
| $\alpha_{s1}$ -CN (9-16)              |         |   |             |   |          |   |       |   |
| $\alpha_{s1}$ -CN (9-19)              |         |   |             |   |          |   |       |   |
| $\alpha_{s1}$ -CN (9-21)              |         |   |             |   |          |   |       |   |
| $\alpha_{s1}$ -CN (9-22)              |         |   |             |   |          |   |       |   |
| $\alpha_{s1}$ -CN (10-22)             |         |   |             |   |          |   |       |   |
| $\alpha_{s1}$ -CN (12-22)             |         |   |             |   |          |   |       |   |
| $\alpha_{s1}$ -CN (13-22)             |         |   |             |   |          |   |       |   |
| $\alpha_{s1}$ -CN (14-22)             |         |   |             |   |          |   |       |   |
| $\alpha_{s1}$ -CN (14-23)             |         |   |             |   |          |   |       |   |
| $\alpha_{s1}$ -CN (17-22)             |         |   |             |   |          |   |       |   |
| $\alpha_{s1}$ -CN (17-23)             |         |   |             |   |          |   |       |   |
| $\alpha_{s1}$ -CN (24-30)             |         |   |             |   |          |   |       |   |
| $\alpha_{s1}$ -CN (25-30)             |         |   |             |   |          |   |       |   |
| $\alpha_{s1}$ -CN (31-40)             |         |   |             |   |          |   |       |   |
| $\alpha_{s1}$ -CN (32-40)             |         |   |             |   |          |   |       |   |
| $\alpha_{s1}$ -CN (33-40)             |         |   |             |   |          |   |       |   |
| $\alpha_{s1}$ -CN (41-60) <b>2P</b>   |         |   |             |   |          |   |       |   |
| $\alpha_{s1}$ -CN (83-92)             |         |   |             |   |          |   |       |   |
| $\alpha_{s1}$ -CN (83-98)             |         |   |             |   |          |   |       |   |
| $\alpha_{s1}$ -CN (84-92)             |         |   |             |   |          |   |       |   |
| $\alpha_{s1}$ -CN (84-93)             |         |   |             |   |          |   |       |   |
| $\alpha_{s1}$ -CN (103-121) <b>1P</b> |         |   |             |   |          |   |       |   |
| $\alpha_{s1}$ -CN (104-110)           |         |   |             |   |          |   |       |   |
| $\alpha_{s1}$ -CN (104-121) <b>1P</b> |         |   |             |   |          |   |       |   |
| $\alpha_{s1}$ -CN (105-114)           |         |   |             |   |          |   |       |   |
| $\alpha_{s1}$ -CN (105-121) <b>1P</b> |         |   |             |   |          |   |       |   |
| $\alpha_{s1}$ -CN (108-114)           |         |   |             |   |          |   |       |   |
| $\alpha_{s1}$ -CN (108-135) <b>1P</b> |         |   |             |   |          |   |       |   |
| $\alpha_{s1}$ -CN (109-121) <b>1P</b> |         |   |             |   |          |   |       |   |
| $\alpha_{s1}$ -CN (109-123) <b>1P</b> |         |   |             |   |          |   |       |   |
| $\alpha_{s1}$ -CN (109-130) <b>1P</b> |         |   |             |   |          |   |       |   |
| $\alpha_{s1}$ -CN (110-121) <b>1P</b> |         |   |             |   |          |   |       |   |
| $\alpha_{s1}$ -CN (111-121) <b>1P</b> |         |   |             |   |          |   |       |   |
| $\alpha_{s1}$ -CN (111-123) <b>1P</b> |         |   |             |   |          |   |       |   |
| $\alpha_{s1}$ -CN (111-124) <b>1P</b> |         |   |             |   |          |   |       |   |
| $\alpha_{s1}$ -CN (111-130) <b>1P</b> |         |   |             |   |          |   |       |   |
| $\alpha_{s1}$ -CN (112-121) <b>1P</b> |         |   |             |   |          |   |       |   |
| $\alpha_{s1}$ -CN (113-121) <b>1P</b> |         |   |             |   |          |   |       |   |

|                                       |    |   |    |   |   |   |    |
|---------------------------------------|----|---|----|---|---|---|----|
| $\alpha_{s1}$ -CN (115-123) <b>1P</b> | ■  |   |    |   |   |   |    |
| $\alpha_{s1}$ -CN (115-124) <b>1P</b> |    |   |    |   |   |   |    |
| $\alpha_{s1}$ -CN (115-130) <b>1P</b> |    |   |    |   |   |   |    |
| $\alpha_{s1}$ -CN (122-130)           |    |   |    |   |   |   |    |
| $\alpha_{s1}$ -CN (131-138)           |    |   |    |   |   |   |    |
| $\alpha_{s1}$ -CN (131-139)           | ■  |   |    |   |   |   |    |
| $\alpha_{s1}$ -CN (131-142)           |    |   |    |   | ■ |   |    |
| $\alpha_{s1}$ -CN (131-143)           |    |   |    |   |   | ■ |    |
| $\alpha_{s1}$ -CN (132-142)           | ■  |   |    |   |   |   | ■  |
| $\alpha_{s1}$ -CN (136-142)           | ■  |   |    |   |   |   | ■  |
| $\alpha_{s1}$ -CN (139-148)           | ■  |   |    |   |   |   |    |
| $\alpha_{s1}$ -CN (170-189)           | ■  |   |    |   |   |   |    |
| $\alpha_{s1}$ -CN (173-189)           |    |   |    |   |   |   |    |
| $\alpha_{s1}$ -CN (178-199)           |    | ■ |    |   |   |   |    |
| $\alpha_{s1}$ -CN (179-192)           | ■  |   |    |   |   |   |    |
| $\alpha_{s1}$ -CN (179-199)           |    |   |    |   |   |   |    |
| $\alpha_{s1}$ -CN (180-189)           | ■  |   |    |   |   |   |    |
| $\alpha_{s1}$ -CN (185-199)           |    | ■ |    |   |   |   |    |
| $\alpha_{s1}$ -CN (187-199)           |    |   | ■  |   |   |   |    |
| Total number of                       | 22 | 9 | 34 | 1 | 1 | 4 | 16 |
|                                       |    |   |    |   |   |   | 0  |

■, peptide present; 1P or 2P correspond to the presence of 1 or 2 phosphorylated residues in the peptide.

**TABLE S2** Peptides identified from  $\beta$ -casein hydrolysis by four strains of *L. helveticus*; peptides released from purified casein (P) or in milk (M). Strains having two CEPs (ITGLH1 and Rosell5088) and strains having only one CEP (ITGLH77 and ISLC5) are shown.

| $\beta$ -CN Peptides          | ITG LH1 |   | Rosell 5088 |   | ITG LH77 |   | ISLC5 |   |
|-------------------------------|---------|---|-------------|---|----------|---|-------|---|
|                               | P       | M | P           | M | P        | M | P     | M |
| $\beta$ -CN (1-6)             |         |   |             |   |          |   |       |   |
| $\beta$ -CN (2-6)             | ■       |   |             |   |          |   |       |   |
| $\beta$ -CN (7-27) <b>4P</b>  |         |   |             | ■ |          | ■ |       |   |
| $\beta$ -CN (7-28) <b>4P</b>  |         |   |             | ■ |          | ■ |       | ■ |
| $\beta$ -CN (28-39) <b>1P</b> |         |   |             |   |          |   |       |   |
| $\beta$ -CN (28-40) <b>1P</b> |         | ■ |             |   |          |   |       |   |
| $\beta$ -CN (28-46) <b>1P</b> | ■       |   |             |   |          | ■ |       |   |
| $\beta$ -CN (28-52) <b>1P</b> |         |   |             |   | ■        | ■ |       |   |
| $\beta$ -CN (29-36) <b>1P</b> |         |   |             |   |          | ■ |       |   |
| $\beta$ -CN (29-46) <b>1P</b> |         |   |             |   |          | ■ |       |   |
| $\beta$ -CN (29-52) <b>1P</b> |         |   |             |   |          | ■ |       |   |
| $\beta$ -CN (29-56) <b>1P</b> |         |   |             |   |          | ■ |       |   |
| $\beta$ -CN (31-52) <b>1P</b> |         |   | ■           |   |          | ■ |       |   |
| $\beta$ -CN (32-46) <b>1P</b> |         | ■ |             |   |          |   |       |   |
| $\beta$ -CN (34-52) <b>1P</b> | ■       |   |             |   |          | ■ |       |   |
| $\beta$ -CN (35-52)           |         |   |             | ■ |          |   |       |   |
| $\beta$ -CN (37-52)           |         | ■ |             |   |          |   |       |   |
| $\beta$ -CN (43-56)           |         |   |             |   |          | ■ |       |   |
| $\beta$ -CN (44-52)           |         |   |             |   |          | ■ |       |   |
| $\beta$ -CN (47-52)           | ■       |   |             |   |          |   |       |   |
| $\beta$ -CN (53-72)           |         | ■ |             | ■ |          |   |       |   |
| $\beta$ -CN (57-68)           |         |   | ■           |   |          |   | ■     |   |
| $\beta$ -CN (57-72)           |         | ■ | ■           | ■ |          |   |       |   |
| $\beta$ -CN (58-68)           |         |   |             |   |          |   | ■     |   |
| $\beta$ -CN (59-68)           |         |   |             |   |          |   | ■     |   |
| $\beta$ -CN (59-72)           |         | ■ |             | ■ |          |   |       |   |
| $\beta$ -CN (66-72)           | ■       |   |             |   |          |   |       |   |
| $\beta$ -CN (70-77)           |         |   |             |   |          |   | ■     |   |
| $\beta$ -CN (73-79)           | ■       |   |             |   |          |   |       |   |
| $\beta$ -CN (73-97)           |         |   |             |   |          | ■ |       |   |
| $\beta$ -CN (73-105)          |         |   | ■           |   | ■        |   | ■     |   |
| $\beta$ -CN (74-79)           |         |   |             |   |          |   | ■     |   |
| $\beta$ -CN (74-82)           | ■       |   |             |   |          |   |       |   |
| $\beta$ -CN (75-102)          |         |   |             |   |          | ■ |       |   |
| $\beta$ -CN (78-91)           |         |   |             |   |          |   | ■     |   |
| $\beta$ -CN (79-91)           |         |   |             |   |          |   | ■     |   |
| $\beta$ -CN (80-91)           |         |   |             |   |          |   | ■     |   |
| $\beta$ -CN (80-93)           | ■       |   |             |   |          |   |       |   |
| $\beta$ -CN (80-96)           |         |   |             |   |          |   | ■     |   |
| $\beta$ -CN (80-101)          |         |   |             |   |          |   | ■     |   |
| $\beta$ -CN (81-105)          |         |   | ■           |   |          |   |       |   |
| $\beta$ -CN (82-91)           |         |   |             |   |          |   | ■     |   |
| $\beta$ -CN (83-91)           |         |   |             |   |          |   | ■     |   |
| $\beta$ -CN (84-88)           | ■       |   |             |   |          |   |       |   |
| $\beta$ -CN (84-91)           |         |   |             |   |          |   | ■     |   |
| $\beta$ -CN (85-91)           |         |   |             |   |          |   | ■     |   |
| $\beta$ -CN (85-97)           |         |   |             |   |          | ■ |       | ■ |
| $\beta$ -CN (85-105)          |         | ■ |             | ■ |          |   |       | ■ |

| β-CN Peptides  | ITG LH1 |   | Rosell 5088 |   | ITG LH77 |   | ISLC5 |   |
|----------------|---------|---|-------------|---|----------|---|-------|---|
|                | P       | M | P           | M | P        | M | P     | M |
| β-CN (88-93)   | ■       |   |             |   |          |   |       |   |
| β-CN (92-105)  |         | ■ |             |   |          |   |       |   |
| β-CN (94-105)  |         |   |             | ■ |          |   | ■     |   |
| β-CN (97-105)  |         | ■ |             |   |          |   |       |   |
| β-CN (106-111) |         |   |             |   |          |   | ■     |   |
| β-CN (106-119) |         | ■ |             | ■ |          |   | ■     |   |
| β-CN (106-124) |         |   |             |   |          | ■ |       |   |
| β-CN (106-134) |         |   |             |   |          |   | ■     |   |
| β-CN (107-119) |         | ■ |             | ■ |          | ■ | ■     |   |
| β-CN (108-119) |         |   |             |   |          |   |       |   |
| β-CN (109-119) |         |   |             |   |          |   |       |   |
| β-CN (111-119) | ■       |   |             | ■ |          | ■ |       |   |
| β-CN (114-119) | ■       |   |             | ■ |          | ■ |       |   |
| β-CN (120-127) |         |   |             |   |          |   | ■     |   |
| β-CN (120-128) | ■       |   |             |   |          |   |       |   |
| β-CN (120-138) |         | ■ |             |   |          |   |       |   |
| β-CN (120-141) |         |   |             | ■ | ■        |   |       |   |
| β-CN (124-131) |         |   |             |   |          |   | ■     |   |
| β-CN (126-131) | ■       |   |             |   |          |   | ■     |   |
| β-CN (126-133) | ■       |   |             |   |          |   |       |   |
| β-CN (126-155) | ■       |   |             |   |          |   |       |   |
| β-CN (127-141) |         |   |             |   |          | ■ |       |   |
| β-CN (128-139) |         |   |             | ■ |          | ■ |       |   |
| β-CN (128-141) |         |   |             |   |          | ■ |       |   |
| β-CN (128-143) |         |   |             | ■ |          | ■ |       |   |
| β-CN (129-136) | ■       |   |             |   |          | ■ |       |   |
| β-CN (129-138) |         | ■ |             |   |          | ■ |       |   |
| β-CN (129-139) |         | ■ |             | ■ |          | ■ | ■     |   |
| β-CN (129-141) | ■       | ■ |             | ■ |          | ■ | ■     |   |
| β-CN (129-142) |         |   |             |   |          | ■ |       |   |
| β-CN (129-143) |         |   |             |   |          | ■ |       |   |
| β-CN (129-146) | ■       |   |             |   |          |   |       |   |
| β-CN (129-158) |         |   |             |   |          | ■ |       |   |
| β-CN (130-139) |         |   |             | ■ |          |   |       |   |
| β-CN (132-139) |         |   |             | ■ |          |   |       |   |
| β-CN (132-141) |         |   |             | ■ |          |   |       |   |
| β-CN (133-139) |         |   |             |   |          |   |       |   |
| β-CN (134-139) |         |   |             | ■ |          |   | ■     |   |
| β-CN (134-141) |         |   |             |   |          |   | ■     |   |
| β-CN (135-139) |         |   |             | ■ |          |   |       |   |
| β-CN (135-141) |         |   |             |   |          |   |       |   |
| β-CN (141-148) |         |   |             |   |          |   | ■     |   |
| β-CN (142-160) |         |   |             |   |          | ■ |       |   |
| β-CN (142-163) |         |   |             | ■ |          |   |       |   |
| β-CN (144-154) |         |   |             | ■ |          |   |       |   |
| β-CN (144-163) |         |   |             |   |          | ■ |       |   |
| β-CN (145-154) |         |   |             | ■ |          |   |       |   |
| β-CN (145-161) |         | ■ |             | ■ |          |   |       |   |



| β-CN Peptides            | ITG LH1 |    | Rosell 5088 |    | ITG LH77 |    | ISLC5 |   |
|--------------------------|---------|----|-------------|----|----------|----|-------|---|
|                          | P       | M  | P           | M  | P        | M  | P     | M |
| β-CN (145-163)           |         |    |             |    |          |    |       |   |
| β-CN (146-154)           |         |    |             |    |          |    |       |   |
| β-CN (148-154)           | ■       |    |             |    | ■        |    | ■     |   |
| β-CN (149-154)           | ■       |    | ■           |    | ■        |    |       |   |
| β-CN (155-161)           |         |    | ■           |    | ■        |    |       |   |
| β-CN (157-161)           |         |    |             |    |          |    | ■     |   |
| β-CN (161-167)           |         |    |             |    |          |    | ■     |   |
| β-CN (164-175)           |         |    |             |    |          |    | ■     |   |
| β-CN (164-182)           |         | ■  |             | ■  |          |    |       |   |
| β-CN (166-175)           |         |    |             |    | ■        |    | ■     |   |
| β-CN (167-175)           |         |    |             |    | ■        |    | ■     |   |
| β-CN (167-191)           |         |    |             |    |          |    |       |   |
| β-CN (168-175)           |         |    | ■           |    | ■        |    |       |   |
| β-CN (169-175)           |         |    | ■           |    | ■        |    |       |   |
| β-CN (170-175)           |         |    | ■           |    | ■        |    |       |   |
| β-CN (171-175)           |         |    |             |    |          |    |       |   |
| β-CN (176-189)           |         |    |             |    |          | ■  | ■     |   |
| β-CN (177-182)           |         |    | ■           |    | ■        |    | ■     |   |
| β-CN (183-189)           |         |    |             |    |          |    |       |   |
| β-CN (183-190)           |         |    | ■           |    |          |    | ■     |   |
| β-CN (183-209)           |         | ■  |             |    |          |    |       |   |
| β-CN (184-188)           |         |    |             |    | ■        |    | ■     |   |
| β-CN (184-190)           |         |    |             |    | ■        |    |       |   |
| β-CN (189-209)           |         |    | ■           |    |          |    |       |   |
| β-CN (190-209)           |         | ■  |             |    |          |    |       |   |
| β-CN (191-206)           |         |    |             |    |          | ■  | ■     |   |
| β-CN (191-209)           |         |    | ■           |    |          |    |       |   |
| β-CN (192-206)           |         |    | ■           |    |          |    | ■     |   |
| β-CN (192-209)           |         | ■  | ■           |    |          |    | ■     |   |
| β-CN (193-198)           | ■       |    | ■           |    | ■        |    | ■     |   |
| β-CN (193-201)           | ■       |    | ■           |    | ■        |    | ■     |   |
| β-CN (193-202)           |         |    |             |    |          |    |       |   |
| β-CN (193-206)           |         |    | ■           |    |          |    |       |   |
| β-CN (193-207)           |         |    |             |    |          |    |       |   |
| β-CN (193-209)           |         | ■  | ■           |    |          | ■  |       |   |
| β-CN (194-200)           | ■       |    |             |    |          |    |       |   |
| β-CN (194-201)           | ■       |    | ■           |    |          |    | ■     |   |
| β-CN (194-202)           |         |    |             |    |          |    |       |   |
| β-CN (194-206)           | ■       |    | ■           |    | ■        |    | ■     |   |
| β-CN (194-207)           |         |    |             |    |          |    |       |   |
| β-CN (194-209)           |         | ■  | ■           |    | ■        |    | ■     |   |
| β-CN (195-201)           | ■       |    |             |    |          |    |       |   |
| β-CN (195-204)           |         |    |             |    |          |    |       |   |
| β-CN (195-206)           | ■       |    |             |    | ■        |    |       |   |
| β-CN (203-209)           |         |    |             |    |          |    | ■     |   |
| Total number of peptides | 32      | 27 | 36          | 21 | 42       | 27 | 58    | 3 |

■, peptide present; 1P or 4P correspond to the presence of 1 or 4 phosphorylated residues in the peptide.
